# Supplementary material
Source: publisher figshare collection journal article supplement (https://karger.figshare.com/ndownloader/files/12994748)
Supplement: Supplementary file 1 [file 12994748]

**A. Organic GHD (USA n=105; GE n=161; FR n=109)**

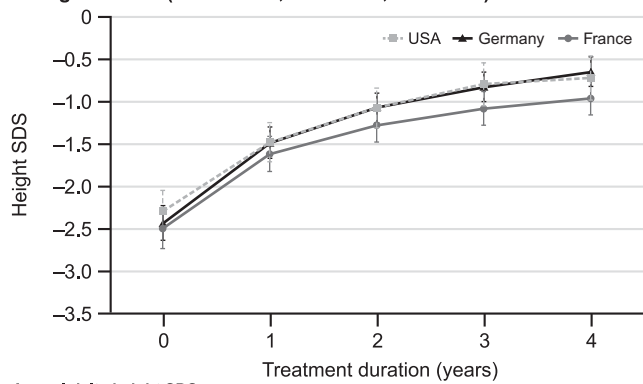

**Annual delta height SDS**

|         | Year 0 to 1       | Year 1 to 2       | Year 2 to 3       | Year 3 to 4       |
|---------|-------------------|-------------------|-------------------|-------------------|
| USA     | 0.81 (0.67; 0.96) | 0.41 (0.32; 0.49) | 0.28 (0.21; 0.35) | 0.09 (0.02; 0.16) |
| Germany | 0.90 (0.80; 1.01) | 0.41 (0.34; 0.47) | 0.24 (0.19; 0.29) | 0.18 (0.14; 0.23) |
| France  | 0.87 (0.72; 1.01) | 0.33 (0.26; 0.41) | 0.20 (0.15; 0.26) | 0.11 (0.06; 0.17) |

**B. Isolated idiopathic GHD (USA n=437; GE n=569; FR n=294)**

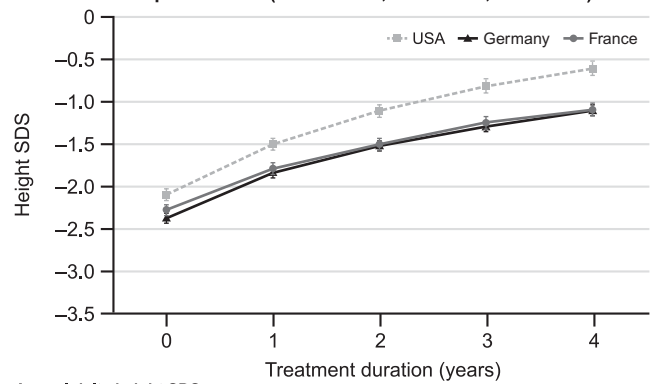

**Annual delta height SDS**

|         | Year 0 to 1       | Year 1 to 2       | Year 2 to 3       | Year 3 to 4       |
|---------|-------------------|-------------------|-------------------|-------------------|
| USA     | 0.61 (0.57; 0.65) | 0.39 (0.36; 0.42) | 0.32 (0.29; 0.35) | 0.22 (0.19; 0.24) |
| Germany | 0.55 (0.51; 0.58) | 0.32 (0.30; 0.35) | 0.23 (0.21; 0.25) | 0.20 (0.17; 0.22) |
| France  | 0.51 (0.47; 0.55) | 0.28 (0.25; 0.32) | 0.26 (0.22; 0.30) | 0.17 (0.13; 0.20) |

**C. SGA (USA n=40; GE n=102; FR n=112)**

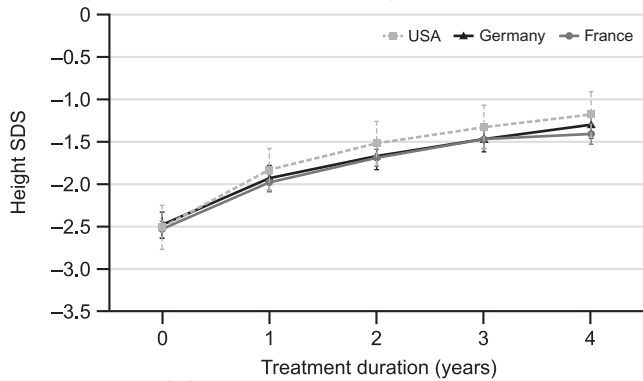

**Annual delta height SDS**

|         | Year 0 to 1       | Year 1 to 2       | Year 2 to 3       | Year 3 to 4       |
|---------|-------------------|-------------------|-------------------|-------------------|
| USA     | 0.69 (0.53; 0.85) | 0.34 (0.25; 0.44) | 0.18 (0.08; 0.28) | 0.17 (0.08; 0.26) |
| Germany | 0.53 (0.47; 0.59) | 0.28 (0.21; 0.36) | 0.20 (0.15; 0.25) | 0.17 (0.12; 0.22) |
| France  | 0.56 (0.50; 0.63) | 0.29 (0.23; 0.35) | 0.22 (0.17; 0.28) | 0.06 (0.01; 0.11) |

**D. Turner syndrome (USA n=103; GE n=129; FR n=46)**

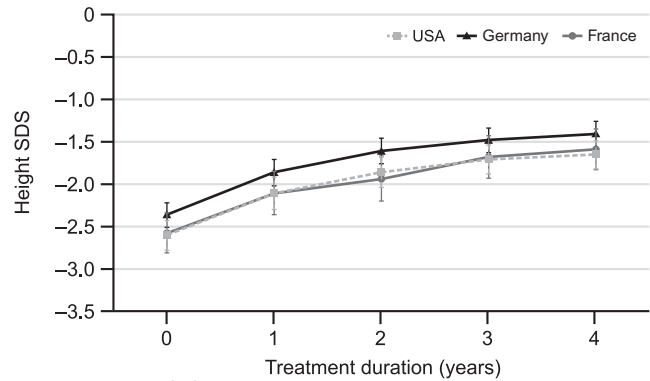

**Annual delta height SDS**

|         | Year 0 to 1       | Year 1 to 2       | Year 2 to 3       | Year 3 to 4       |
|---------|-------------------|-------------------|-------------------|-------------------|
| USA     | 0.53 (0.44; 0.61) | 0.25 (0.18; 0.31) | 0.14 (0.08; 0.20) | 0.06 (0.00; 0.12) |
| Germany | 0.50 (0.44; 0.56) | 0.25 (0.20; 0.30) | 0.14 (0.09; 0.19) | 0.08 (0.03; 0.13) |
| France  | 0.47 (0.37; 0.56) | 0.18 (0.09; 0.27) | 0.25 (0.17; 0.33) | 0.09 (0.00; 0.19) |

**E. SHOX deficiency (USA n=10; GE n=67; FR n=46)**

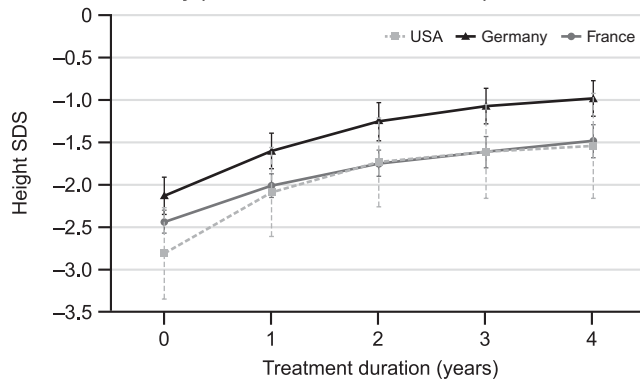

**Annual delta height SDS**

|         | Year 0 to 1       | Year 1 to 2       | Year 2 to 3       | Year 3 to 4        |
|---------|-------------------|-------------------|-------------------|--------------------|
| USA     | 0.71 (0.50; 0.91) | 0.33 (0.16; 0.49) | 0.13 (0.00; 0.27) | 0.05 (-0.16; 0.27) |
| Germany | 0.54 (0.44; 0.64) | 0.36 (0.25; 0.48) | 0.18 (0.12; 0.24) | 0.09 (0.01; 0.18)  |
| France  | 0.45 (0.35; 0.55) | 0.26 (0.16; 0.36) | 0.13 (0.04; 0.22) | 0.14 (0.06; 0.21)  |
